# Supplementary material for: Association between In Utero arsenic exposure, placental gene expression, and infant birth weight: a US birth cohort study
Source: PubMed Central journal article supplement (PMC3733767; doi:10.1186/1476-069x-12-58), 2013-07-16
Supplement: 1476-069X-12-58-S1.pdf [file 1476-069X-12-58-S1.pdf]

## Supplemental Figure S1

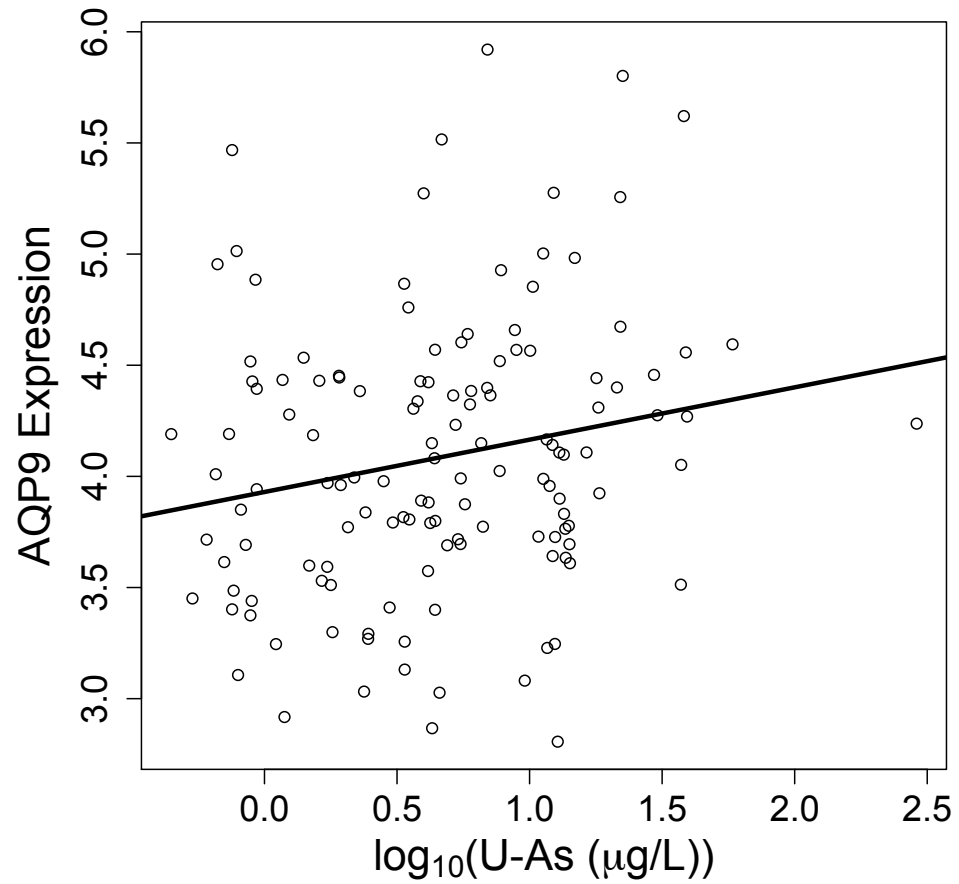

**Scattered plot view of the association between U-As and the placental expression of *AQP9*.**

## Supplemental Figure S2

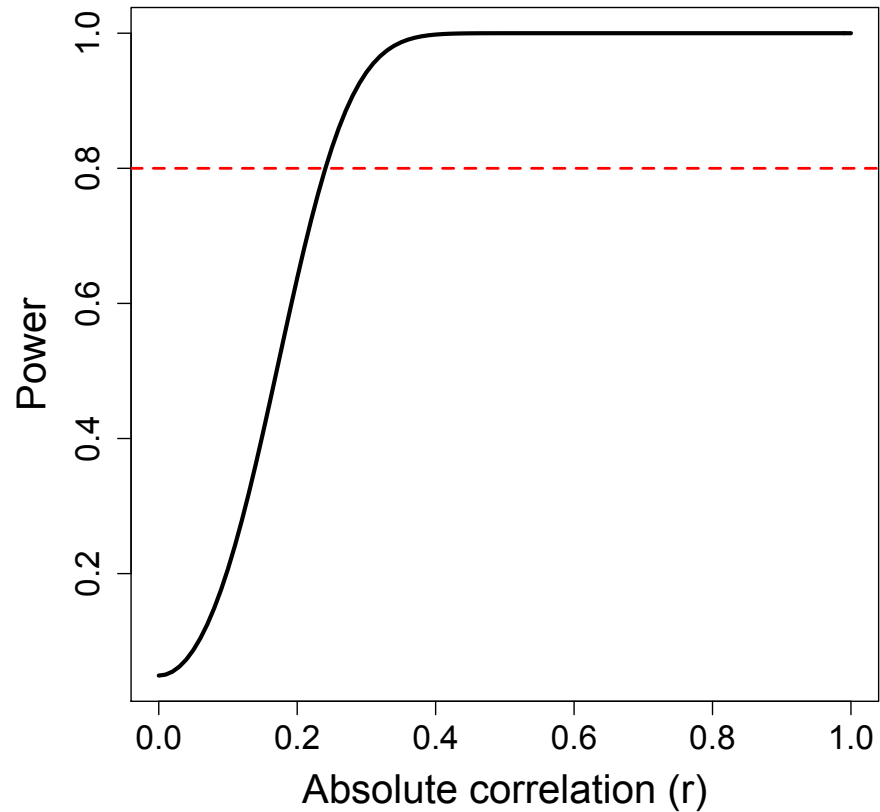

**Sample size power analysis.** Plot of power as a function of Pearson correlation ( $r$ ), assuming the study sample size ( $n = 133$ ) and a statistical significance threshold of 0.05. Red dotted line denotes 80% power.

**Supplemental Table S1. Associations between maternal urinary arsenic concentrations during pregnancy (U-As) and the expression of placental genes.**

| Gene Expression | U-As <sup>a</sup>    |               |
|-----------------|----------------------|---------------|
|                 | Coefficient Estimate | 95% CI        |
| AKR1C3          | -0.16                | (-0.33, 0.0)  |
| ENPP2           | -0.06                | (-0.18, 0.06) |
| HMOX1           | 0.04                 | (-0.05, 0.14) |
| LEP             | -0.20                | (-0.70, 0.30) |
| NFE2L2          | -0.04                | (-0.14, 0.05) |
| TYMS            | 0.02                 | (-0.09, 0.13) |
| AS3MT           | -0.04                | (-0.15, 0.07) |
| AQP9            | 0.25                 | (0.05, 0.45)  |
| SLC39A2         | -0.07                | (-0.20, 0.07) |

<sup>a</sup>Adjusted for maternal age.

**Supplemental Table S2. Associations between maternal urinary arsenic concentrations during pregnancy (U-As) and the expression of placental genes after further adjustment of urinary creatinine levels in a subset of participants (n =91).**

| Gene Expression | U-As <sup>a</sup>    |                |
|-----------------|----------------------|----------------|
|                 | Coefficient Estimate | 95% CI         |
| AKR1C3          | -0.17                | (-0.43, 0.09)  |
| ENPP2           | -0.15                | (-0.33, 0.02)  |
| HMOX1           | 0.08                 | (-0.06, 0.22)  |
| LEP             | -0.38                | (-1.13, 0.38)  |
| NFE2L2          | -0.16                | (-0.31, -0.02) |
| TYMS            | 0.00                 | (-0.17, 0.17)  |
| AS3MT           | -0.14                | (-0.29, 0.02)  |
| AQP9            | 0.43                 | (0.14, 0.71)   |
| SLC39A2         | -0.07                | (-0.28, 0.14)  |

<sup>a</sup>Adjusted for maternal age and urinary creatinine levels.

**Supplemental Table S3. The association between maternal toenail arsenic and other metals in a subset of participants (n = 88).**

| Metals | Pearson correlation | p-value |
|--------|---------------------|---------|
| Al     | 0.20                | 0.0629  |
| V      | 0.34                | 0.0013  |
| Cr     | 0.01                | 0.9550  |
| Mn     | 0.34                | 0.0012  |
| Fe     | 0.19                | 0.0815  |
| Ni     | -0.20               | 0.0563  |
| Cu     | -0.15               | 0.1581  |
| Zn     | 0.03                | 0.7842  |
| Se     | -0.17               | 0.1100  |
| Mo     | 0.20                | 0.0594  |
| Cd     | 0.16                | 0.1316  |
| Sn     | 0.18                | 0.1023  |
| Sb     | 0.13                | 0.2336  |
| Hg     | 0.05                | 0.6746  |
| Pb     | 0.09                | 0.4167  |
| U      | 0.28                | 0.0081  |

**Supplemental Table S4. The association between maternal urinary arsenic concentrations during pregnancy (U-As) and AQP9 expression with or without adjustment of maternal toenail Mn levels in a subset of participants (n = 88).**

|                 | Without Mn adjustment |               | With Mn adjustment   |               |
|-----------------|-----------------------|---------------|----------------------|---------------|
| Gene Expression | Coefficient Estimate  | 95% CI        | Coefficient Estimate | 95% CI        |
| AQP9            | 0.18                  | (-0.08, 0.43) | 0.18                 | (-0.07, 0.44) |

**Supplemental Table S5. Associations between the placental expression of *AQP9* and that of other genes.**

| Gene Expression | AQP9 <sup>a</sup>    |                |
|-----------------|----------------------|----------------|
|                 | Coefficient Estimate | 95% CI         |
| AKR1C3          | -0.25                | (-0.39, -0.12) |
| ENPP2           | -0.13                | (-0.22, -0.02) |
| HMOX1           | 0.07                 | (-0.01, 0.15)  |
| LEP             | 0.44                 | (0.02, 0.86)   |
| NFE2L2          | -0.14                | (-0.22, -0.06) |
| TYMS            | -0.18                | (-0.27, -0.09) |
| AS3MT           | -0.05                | (-0.14, 0.05)  |
| SLC39A2         | 0.00                 | (-0.12, 0.11)  |

<sup>a</sup>Adjusted for maternal age.

**Supplemental Table S6. Associations between placental gene expression and infant birth weight.**

| Gene Expression | Birth Weight (kg) <sup>a</sup> |               |
|-----------------|--------------------------------|---------------|
|                 | Coefficient Estimate           | 95% CI        |
| AKR1C3          | 0.00                           | (-0.14, 0.14) |
| ENPP2           | 0.28                           | (0.09, 0.47)  |
| HMOX1           | -0.06                          | (-0.31, 0.19) |
| LEP             | -0.04                          | (-0.08, 0.01) |
| NFE2L2          | -0.02                          | (-0.26, 0.21) |
| TYMS            | 0.03                           | (-0.18, 0.24) |
| AS3MT           | 0.10                           | (-0.12, 0.32) |
| AQP9            | -0.02                          | (-0.13, 0.10) |
| SLC39A2         | 0.07                           | (-0.10, 0.25) |

<sup>a</sup>Adjusted for maternal age and gestational age.
